# Supplementary material for: Group B Streptococci Recto-Vaginal Colonization, Antimicrobial Susceptibility Pattern and Associated factors among Pregnant Women at Selected Health Facilities of Wolaita Sodo Town, Southern Ethiopia
Source: Preprints.org preprint supplement (doi:10.20944/preprints202305.2212.v1), 2023-06-02
Supplement: Supplementary file 1 [file supplementary]

**Clinical Examination & Questionnaire Form**

## 1 Questionnaire Socio - Demographic Data Patient Identification

Facility name ________________ Year __________ Participant code ________

Participants address (Sub city) ________ Telephone ____________ signature__________

Data collector name_________________________ date____________ signature__________

1. Pregnant mothers code: _ _ _ _ _ _ _ _
2. Address; Region------------------- Sub city________ Keble______ Tel:___________
3. Age of the pregnant mother _______________
4. Educational 1.Illitrate (No formal education) 2. Primary (Grade 1–8)

3. Secondary/High school (Grade 9–12) 4.College/university

1. Occupation-----------1.House wife 2. Civil servant 3.Student 4.Merchant
2. Marital statuses 1.Married. 2. Divorced. 3. Single. 4. Cohabit. 5. Other…
3. Religion 1.Protestant. 2. Orthodox. 3. Catholic. 4. Muslim. 5. Other
4. Ethnic group 1.Wolaita. 2. Silte. 3. Garage. 4. Amara 5 Gamo. 6 Oromo 7 Other………
5. Monthly income 1. No income 2.less than 3000 3.3100-5000 4. 5100-10000 5. greater than 10000

**2. Clinical Data (obstetric and medical hx)**

1. Gestational age in weeks ……………………………….

2. Previous history of abortion……… 1.Yes 2. No

3. Previous history of preterm labor……………………… 1. Yes 2. No

4. Previous history of Preterm PROM …………………… 1.Yes 2. No

5. Previous History of *S. agalactiae* infections…………… 1. Yes 2. No

6. Number of Gravida 1.Primigravida 2. Multigravida (2nd 3rd 4th 5th …..) please specify

7. Current History of chronic medical illness …… 1. Yes 2. No

If yes which one of the following is /are present (more than one answer is possible)

1. HIV 2.Diabetes mellitus 3.Cancer 4.Cardiac diseases 5. Renal diseases

6. Chronic bronchitis 7 .Hypertension 8 Other, specify …

8. If resistant to any antibiotic …………………… 1. Yes 2. No

9. History of any contraceptive use………………. 1Yes 2. No

10. History of STI at current pregnancy …………..1 Yes 2 No

11. History of UTI at current pregnancy ………….1 Yes 2 No

12. Antenatal care visits……………………………1 Yes 2 No

**3. Questionnaire (Amharic version.)**

የምትሰጡንንማንኛውንምመረጃእንቀበላለን፡፡

1. የእናትየው መለያ ----------------

2. አድራሻክልል------- ክፍለከተማ------- ቀበሌ---------- ስ.ቁ. --------------------------

3. የእናትየውእድሜ ----------------

4.የትምህርትደረጃ

ሀ. ያልተማረች ለ. 1ኛደረጃ ሐ.2ኛደረጃ መ.ኮሌጅ/ዩኒቨርስቲ

5.የስራሁኔታ

ሀ. የቤትእመቤት ለ.የመንግስትሰራተኛ ሐ.ነጋዴ

6.የእርግዝናሁኔታ

ሀ. የመጀመሪያጊዜ ለ. ሁለተኛናከዛበላይ (2ተኛ፤3ተኛ፤4ተኛ፤5ተኛ----) እባከዎትንይጠቀስ

7.የጽንሱ ጊዜ (በሳምንት) ---------------------

8.ከዚህ በፊትሞቶየተወለደህጻንአጋጥሞዎትያውቃል

ሀ.አዎ ለ.አያውቅም

9.ከዚህ በፊትውርጃ.አጋጥሞዎትያውቃል

ሀ.አዎ ለ.አያውቅም

10. በቅርቡመድሃኒትወስደዋል

ሀ.አዎ ለ.አልወሰድኩም

11.የወሊድ መቆጣጠሪያወስደውያውቃሉ ሀ.አዎ ለ.አልወሰድኩም

**III. Laboratory Form**

1. Date and time of specimen collection: date__/___/2022 E.C, Time __:__PM/AM

2. Serial No…………………… …………3. Card No…………………………………

3. Type of specimen: Rectal and vaginal swab

4. *S. agalactiae* organism isolated 1) Yes 2) No

5. Antimicrobial susceptibility testing S (mm) I (mm) R (mm)

Penicillin ……….. ……….. ………..

Amoxicillin ……….. ……… ……….

Erythromycin ……….. ……… ……….

Clindamycin ……… … ……… …….….

Vancomycin ………… ……… …….….

Chloramphenicol ………….. ………. ……….

Ceftriaxone ……………… ………. ……..

Tetracycline ……………… ……… …………

6. Comment ____________________________________________________

Name of investigator____________________________________

Signature _______________

Date __/__/2022
